# Supplementary material for: Nanoliposomal Nitroglycerin Exerts Potent Anti-Inflammatory Effects
Source: PubMed Central journal article supplement (PMC4653649; doi:10.1038/srep16258), 2015-11-20
Supplement: srep16258-s1.pdf [file srep16258-s1.pdf]

## **Nanoliposomal Nitroglycerin Exerts Potent Anti-Inflammatory Effects**

Soroush Ardekani, Harry A. Scott, Sharad Gupta, Shane Eum, Xiao Yang, Alexander R. Brunelle,  
Sean M. Wilson, Umar Mohideen, Kaustabh Ghosh

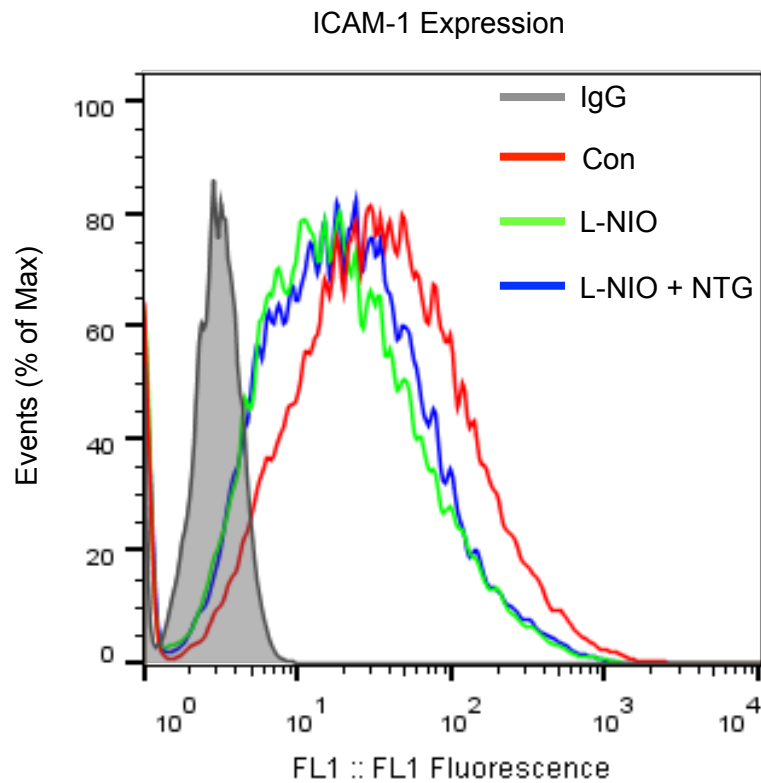

**Supplementary Figure S1. ICAM-1 Expression is Not Altered by L-NIO or NTG Treatment.** ECs were treated overnight with L-NIO (5 mM)  $\pm$  NTG (5  $\mu$ M) and surface expression of endothelial ICAM-1 was determined by flow cytometry. Quantitative analysis of fluorescence vs. size (electronic volume) histogram indicates that neither L-NIO nor NTG treatment alters ICAM-1 expression in ECs.

**A Anti-inflammatory Effect of 'Freshly-synthesized' NTG-NL**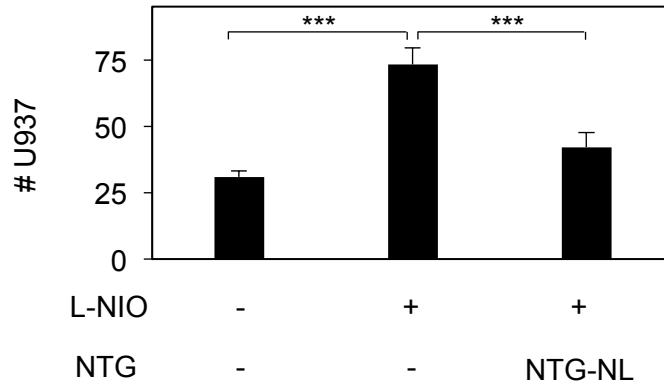**B Anti-inflammatory Effect of 'Stored' NTG-NL**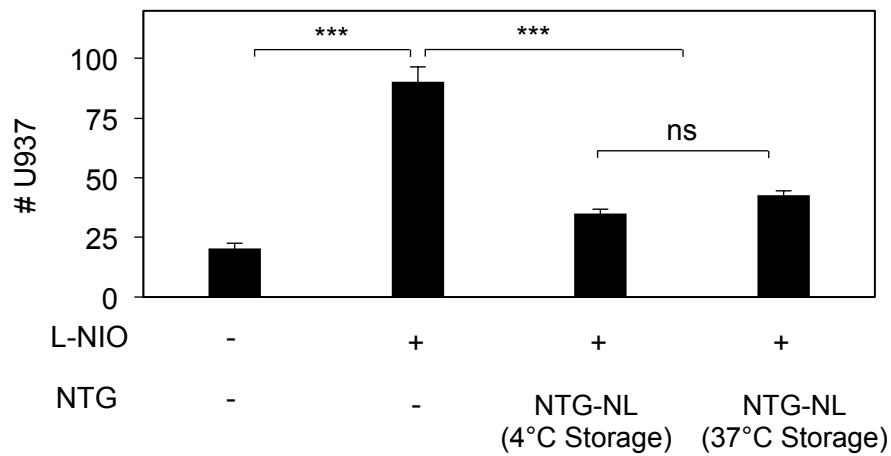

**Supplementary Figure S2. Anti-inflammatory Effects of Freshly-prepared and Stored NTG-NL.** EC monolayers were treated with L-NIO  $\pm$  NTG-NL (100  $\mu$ g/ml) that were either (A) freshly synthesized or (B) stored at 4°C or 37°C for 24 hr prior to use. Quantification of adherent U937 cells (per mm<sup>2</sup>) on EC monolayers (n = 10 fields of view) reveals significant inhibition in U937 cell-EC adhesion following treatment with NTG-NLs that were stored for 24 hr, indicating stable retention of NTG within the lipid core of nanoliposomes. \*\*\*, p<0.001; ns, no significance.

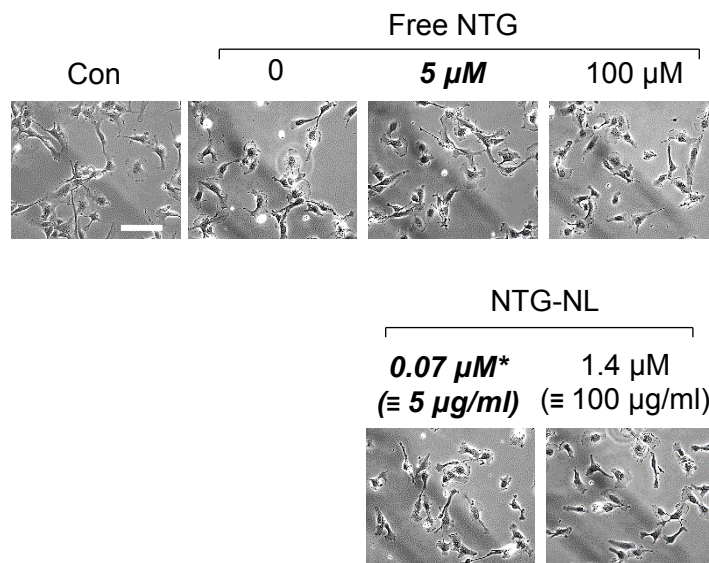

**Supplementary Figure S3. EC Density And Spreading Are Similar Across Various Treatment Conditions.** Phase images of ECs treated without or with L-NIO ± NTG or NTG-NL show that cell spreading is similar across all treatment conditions. Therefore, the difference in MitoSox<sup>®</sup> fluorescence intensity seen in Figure 7A reflects the actual difference in mitochondrial superoxide production. The effective therapeutic NTG dose is indicated *in bold*. Scale bar = 100 μm

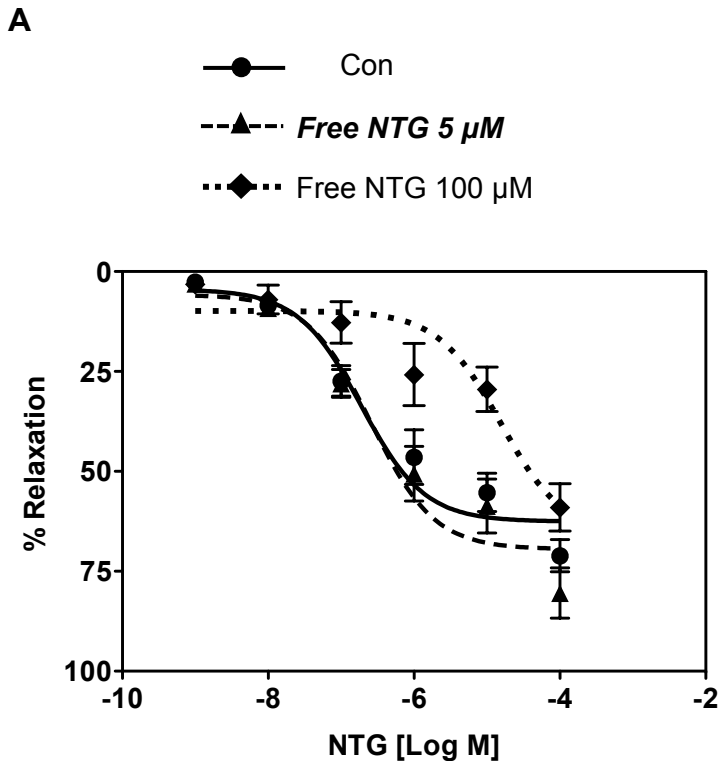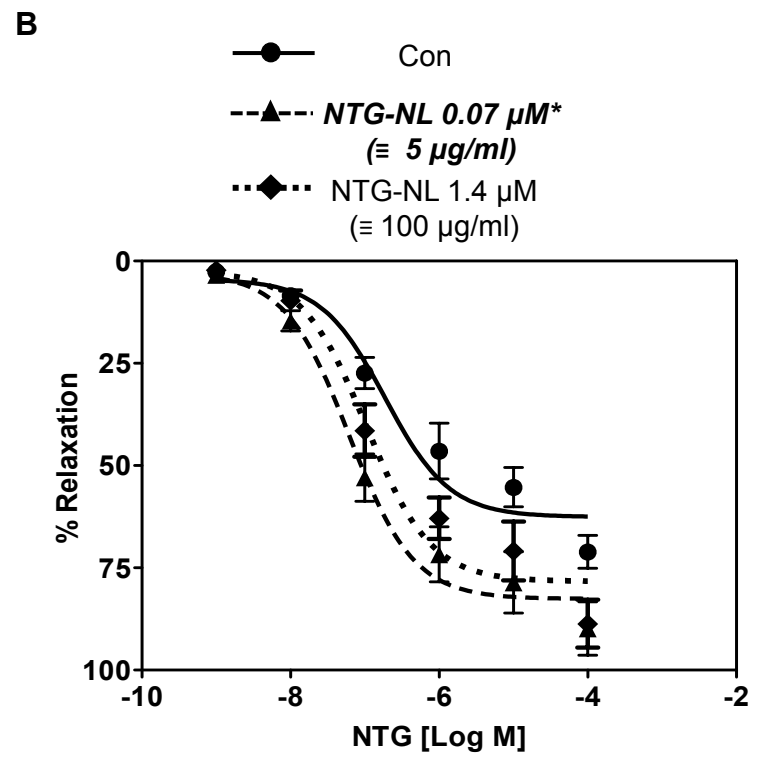

**C**

|                                                                      | $-\text{Log IC}_{50}$ (Mean $\text{IC}_{50}$ , $\mu\text{M}$ ) | Maximal Relaxation (%)         |
|----------------------------------------------------------------------|----------------------------------------------------------------|--------------------------------|
| Con                                                                  | $6.73 \pm 0.14$ (0.19)                                         | $63 \pm 3$                     |
| <b>Free NTG 5 <math>\mu\text{M}</math></b>                           | <b><math>6.60 \pm 0.18</math> (0.25)</b>                       | <b><math>69 \pm 4^*</math></b> |
| Free NTG 100 $\mu\text{M}$                                           | $4.81 \pm 0.24^{***}$ (15.5)                                   | $66 \pm 9$                     |
| <b>NTG-NL 0.07 <math>\mu\text{M}</math></b><br>(5 $\mu\text{g/ml}$ ) | <b><math>7.21 \pm 0.15</math> (0.07)</b>                       | <b><math>83 \pm 3</math></b>   |
| NTG-NL 1.4 $\mu\text{M}$<br>(100 $\mu\text{g/ml}$ )                  | $6.98 \pm 0.15$ (0.10)                                         | $78 \pm 4$                     |

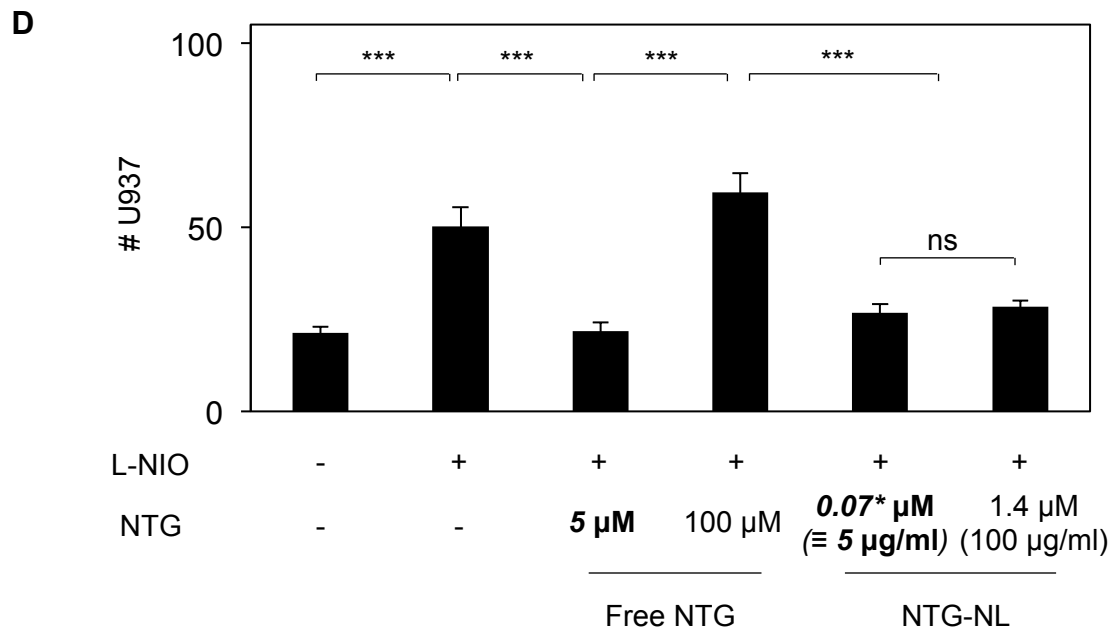

**Supplementary Figure S4. Effects of Free NTG and NTG-NL Treatment on IC50 and Maximal Vasorelaxation of Isolated Pulmonary Sheep Arteries.**

**(A)** Pulmonary arterial rings pretreated with 100  $\mu$ M free NTG exhibit impaired responsiveness to acute NTG treatment, as indicated by a significant rightward shift in NTG dose-relaxation curve ( $n \geq$  eight arterial rings). **(B)** In contrast, arterial rings pretreated with a similar 20-fold higher NTG-NL dose exhibit normal relaxation response to acute NTG treatment.

**(C)** Pulmonary sheep arteries pretreated with the effective (anti-inflammatory) free NTG dose of 5  $\mu$ M exhibit normal NTG dose-relaxation profile similar to untreated controls. In contrast, arteries pretreated with a 20-fold higher free NTG dose (100  $\mu$ M) demonstrate a significant increase in mean IC50 values. Remarkably, pretreatment with NTG-NL at both 5 and 100  $\mu$ g/ml doses exhibit no evidence of NTG tolerance. IC50 are concentrations that produced 50% relaxation in response to NTG stimulation. The maximal relaxation response was, however, similar in the control and both free NTG-treated arteries while the NTG-NL-treated arteries exhibited marginally improved maximal relaxation response. The precise reason for this improvement in maximal relaxation by NTG-NL remains unclear. **(D)** Demonstration of intracellular NTG-NL uptake and bioavailability following 4h treatment. EC monolayers were treated with L-NIO  $\pm$  NTG or NTG-NL for 4 hr prior to addition of fluorescently-labeled U937 monocytic cells. Quantification of adherent U937 cells (per  $\text{mm}^2$ ) on EC monolayers ( $n = 10$  fields of view) show that both NTG at 5  $\mu$ M and NTG-NL at 5  $\mu$ g/ml produce significant inhibition of U937 cell-EC adhesion within 4 hr of treatment. Further, while free NTG loses its therapeutic effect at a 20-fold higher dose of 100  $\mu$ M, NTG-NL retains its immunosuppressive effects at a similar 20-fold greater dose (100  $\mu$ g/mL). Thus, the anti-inflammatory effects of free NTG and NTG-NL observed after 4 hr of treatment are consistent with those seen following overnight treatment.

**\*\***,  $p < 0.01$ ; **\*\*\***,  $p < 0.001$ ; ns, no significance. Therapeutic dose is highlighted ***in bold***. Data are expressed as mean  $\pm$  SEM.

**ESI-MS Analysis of NTG Incorporation Efficiency within Nanoliposomes (NL)**

| Initial NTG Loading (% w/w) | Incorporated NTG (Peak Area) | NTG Incorporation Efficiency (%) |
|-----------------------------|------------------------------|----------------------------------|
| 5                           | 3039                         | 15.6                             |
| 10                          | 14307                        | 36.4                             |
| 25                          | 28653                        | 23.4                             |

**Supplementary Table S1. ESI-MS Analysis of NTG Incorporation Efficiency within NLs.** NTG incorporation within NLs increased with increasing loading (5, 10, and 25% wt. NTG/wt. NLs), although the maximum incorporation efficiency was observed at the intermediate NTG loading of 10% w/w (~37% incorporation efficiency). This trend is consistent with drug loading within nanoparticles, as previously reported.<sup>1</sup>

**References:**

1. Kilfoyle, B. E. *et al.* Development of paclitaxel-TyroSpheres for topical skin treatment. *J Control Release* **163**, 18-24, doi:Doi 10.1016/J.Jconrel.2012.06.021 (2012).

**Nanoliposome (NL) Uptake by Cultured ECs**

| NL Conc.<br>( $\mu\text{g/ml}$ ) | NL Uptake<br>Net Fluor. Int. (A.U) | % NL<br>Uptake |
|----------------------------------|------------------------------------|----------------|
| 5                                | 72                                 | 9.0            |
| 10                               | 163                                | 5.1            |
| 50                               | 579                                | 2.0            |
| 100                              | 1580                               | 0.8            |

**Supplementary Table S2. NL Uptake by Cultured ECs.** When added to cultured ECs, fluorescently-labeled nanoliposomes undergo dose-dependent uptake by ECs, with the net internalized amount increasing with increasing NL dose. However, this dose-dependent increase in net NL uptake is inversely proportional to *percent* uptake by ECs, which is the highest at 5  $\mu\text{g/ml}$  dose and decreases progressively with increasing NL dose.
